# Supplementary material
Source: publisher figshare collection journal article supplement (https://sage.figshare.com/ndownloader/files/17459579)
Supplement: Supplementary file 1 [file 17459579]

# HONOR VIOLENCE AND RELIGION

## Appendix Table A1

### *Operationalization of our constructs.*

| Construct                          | Question wording                                                                                                                                                                                                                                                                                                                                                                                           | Coding |
|------------------------------------|------------------------------------------------------------------------------------------------------------------------------------------------------------------------------------------------------------------------------------------------------------------------------------------------------------------------------------------------------------------------------------------------------------|--------|
| Support for honor killing of women | „Some people think that if a woman engages in premarital sex or adultery, it is justified for family members to end her life in order to protect the family’s honor. Others believe that this practice is not justified, no matter the circumstances. Do you personally feel that this practice is often justified to defend the family honor, sometimes justified, rarely justified, or never justified?“ | 4 to 1 |
| Support for honor killing of men   | “Some people think that if a man engages in premarital sex or adultery, it is justified for family members to end his life in order to protect the family’s honor. Others believe that this practice is not justified, no matter the circumstances. Do you personally feel that this practice is often justified to defend the family honor, sometimes justified, rarely justified, or never justified?“   | 4 to 1 |
| Prayer frequency                   | “People practice their religion in                                                                                                                                                                                                                                                                                                                                                                         | 7 to 1 |

## HONOR VIOLENCE AND RELIGION

|                             |                                                                                                                                                                                                                                                                                                                                                                                                                                                                                                            |                                                                                                                                |
|-----------------------------|------------------------------------------------------------------------------------------------------------------------------------------------------------------------------------------------------------------------------------------------------------------------------------------------------------------------------------------------------------------------------------------------------------------------------------------------------------------------------------------------------------|--------------------------------------------------------------------------------------------------------------------------------|
|                             | different ways. Outside of attending religious services, do you pray several times a day, once a day, a few times a week, once a week, a few times a month, seldom, or never?"                                                                                                                                                                                                                                                                                                                             |                                                                                                                                |
| Mosque attendance frequency | "On average, how often do you attend the mosque for salah and Jum'ah Prayer? More than once a week, once a week for Jum'ah prayer, once or twice a month, a few times a year, seldom or never"                                                                                                                                                                                                                                                                                                             | 5 to 1                                                                                                                         |
| Religious fundamentalism    | <p>"Which one of these comes closest to your opinion, number 1 or number 2? Number 1 – It is not necessary to believe in God in order to be moral and have good values</p> <p>Number 2 – It is necessary to believe in God in order to be moral and have good values."</p> <p>"Now I'm going to read you two statements. Please tell me whether the FIRST statement or the SECOND statement comes closer to your own views — even if neither is exactly right.</p> <p>1 – Islam is the one, true faith</p> | <p>0 (agreement to no fundamentalist response option)</p> <p>to 3 (agreement to all three fundamentalist response options)</p> |

## HONOR VIOLENCE AND RELIGION

leading to eternal life in heaven

2 - Many religions can lead to  
eternal life in heaven.”

“Please tell me whether the  
FIRST statement or the SECOND  
statement comes closer to your  
own views — even if neither is  
exactly right.

1 There is only ONE true way to  
interpret the teachings of my  
religion

2 There is MORE than one true  
way to interpret the teachings of  
my religion.”

|            |                                                          |                                                                                     |
|------------|----------------------------------------------------------|-------------------------------------------------------------------------------------|
| Gender     | -                                                        | Male = 0; Female = 1                                                                |
| Age        | -                                                        | -                                                                                   |
| Education  | Country-specific. Please see Pew Research Center (2013). | Education was z-scaled country-wise as to make it more comparably across countries. |
| Urbanicity | -                                                        | Urban = 0; Rural = 1                                                                |

## HONOR VIOLENCE AND RELIGION

Appendix Table A2

*Average support for honor killings of men and women per country.*

|    | <b>Country</b>          | <b>Sample size</b> | <b>Mean</b> | <b>SD</b> |
|----|-------------------------|--------------------|-------------|-----------|
| 1  | Lebanon                 | 551                | 2.142       | 1.167     |
| 2  | Palestinian Territories | 994                | 2.104       | 1.203     |
| 3  | Niger                   | 946                | 2.092       | 1.197     |
| 4  | Bangladesh              | 1918               | 2.059       | 1.031     |
| 5  | Egypt                   | 1798               | 2.029       | 0.661     |
| 6  | Pakistan                | 1450               | 2.026       | 1.259     |
| 7  | Algeria                 | 1181               | 1.945       | 0.951     |
| 8  | Thailand                | 1010               | 1.838       | 1.071     |
| 9  | Tajikistan              | 1453               | 1.781       | 0.929     |
| 10 | Tunisia                 | 1450               | 1.762       | 1.114     |
| 11 | Jordan                  | 966                | 1.707       | 0.684     |
| 12 | Kosovo                  | 1266               | 1.652       | 0.889     |
| 13 | Kyrgyzstan              | 1292               | 1.639       | 0.890     |
| 14 | Malaysia                | 1244               | 1.622       | 0.966     |
| 15 | Russia                  | 1050               | 1.575       | 0.878     |
| 16 | Turkey                  | 1485               | 1.533       | 0.869     |
| 17 | Albania                 | 788                | 1.477       | 0.854     |
| 18 | Bosnia and Herzegovina  | 1007               | 1.292       | 0.681     |
| 19 | Indonesia               | 1880               | 1.281       | 0.646     |
| 20 | Azerbaijan              | 996                | 1.200       | 0.588     |
| 21 | Kazakhstan              | 998                | 1.187       | 0.482     |

Table A3

*Simple Ordinal Regression Analyses Predicting Support for Honor Killings of Women and Men (N = 25723).*

| Support for Honor Killing of Women (Nagelkerke's $R^2 = 0.24$ ) |       |         |        |        |
|-----------------------------------------------------------------|-------|---------|--------|--------|
| Variable                                                        | OR    | $\beta$ | z      | p      |
| Prayer frequency                                                | 1.004 | 1.009   | 0.539  | .59    |
| Mosque attendance frequency                                     | 1.094 | 1.194   | 10.319 | < .001 |
| Religious fundamentalism                                        | 1.154 | 1.118   | 7.384  | < .001 |
| Gender (female)                                                 | 0.995 | 0.995   | -0.175 | .861   |
| Age                                                             | 0.999 | 0.979   | -1.522 | .128   |
| Education                                                       | 0.915 | 0.915   | -6.601 | < .001 |
| Urbanity (urban)                                                | 1.085 | 1.085   | 2.935  | .003   |
| Support for Honor Killing of Men (Nagelkerke's $R^2 = 0.13$ )   |       |         |        |        |
| Variable                                                        | OR    | $\beta$ | z      | P      |
| Prayer frequency                                                | 1.011 | 1.023   | 1.346  | .178   |
| Mosque attendance frequency                                     | 1.094 | 1.195   | 10.148 | < .001 |
| Religious fundamentalism                                        | 1.193 | 1.147   | 8.86   | < .001 |
| Gender (female)                                                 | 1.001 | 1.001   | 0.041  | .967   |
| Age                                                             | 0.998 | 0.971   | -2.103 | .035   |
| Education                                                       | 0.948 | 0.948   | -3.86  | < .001 |
| Urbanity (urban)                                                | 1.115 | 1.115   | 3.823  | < .001 |

*Notes.* All analyses were controlled for country. OR = Odds ratio;  $\beta$  = standardized (z-scaled)

odds ratio; z = z-value of OR; p = p-value of OR.
